# Supplementary material
Source: HighWire-hosted journal article supplement (https://jnm.snmjournals.org/highwire/filestream/95181/field_highwire_adjunct_files/0/183566_Supplemental_Data.pdf)
Supplement: 183566_Supplemental_Data.pdf [file 183566_Supplemental_Data.pdf]

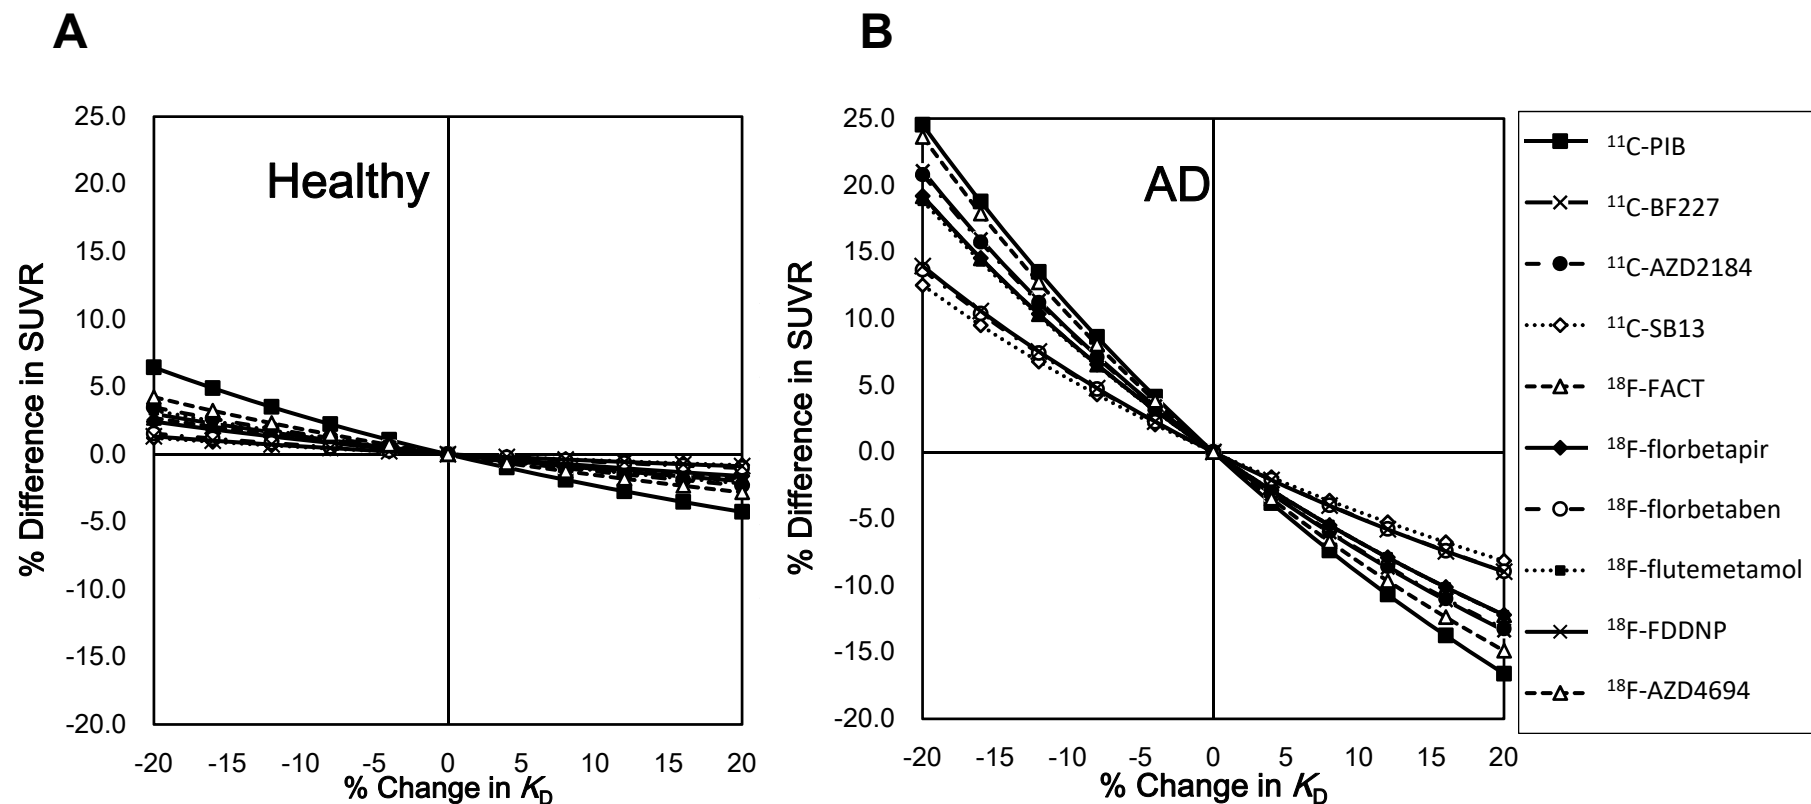

**Supplemental Figure 1.** Error propagation of  $K_D$  to outcome measure of calculated SUVR for healthy (A) and AD (B) conditions for  $^{11}\text{C}$ -PIB,  $^{11}\text{C}$ -BF-227,  $^{11}\text{C}$ -AZD2184,  $^{11}\text{C}$ -SB-13,  $^{18}\text{F}$ -FACT,  $^{18}\text{F}$ -florbetapir,  $^{18}\text{F}$ -florbetaben,  $^{18}\text{F}$ -flutemetamol,  $^{18}\text{F}$ -FDDNP, and  $^{18}\text{F}$ -AZD4694. Each  $K_D$  for these 10 radioligands was varied by -20%, -16%, -12%, -8%, -4%, 0%, 4%, 8%, 12%, 16%, and 20% against original  $K_D$  in Table 2. Percentage difference from original SUVR is shown in these graphs.

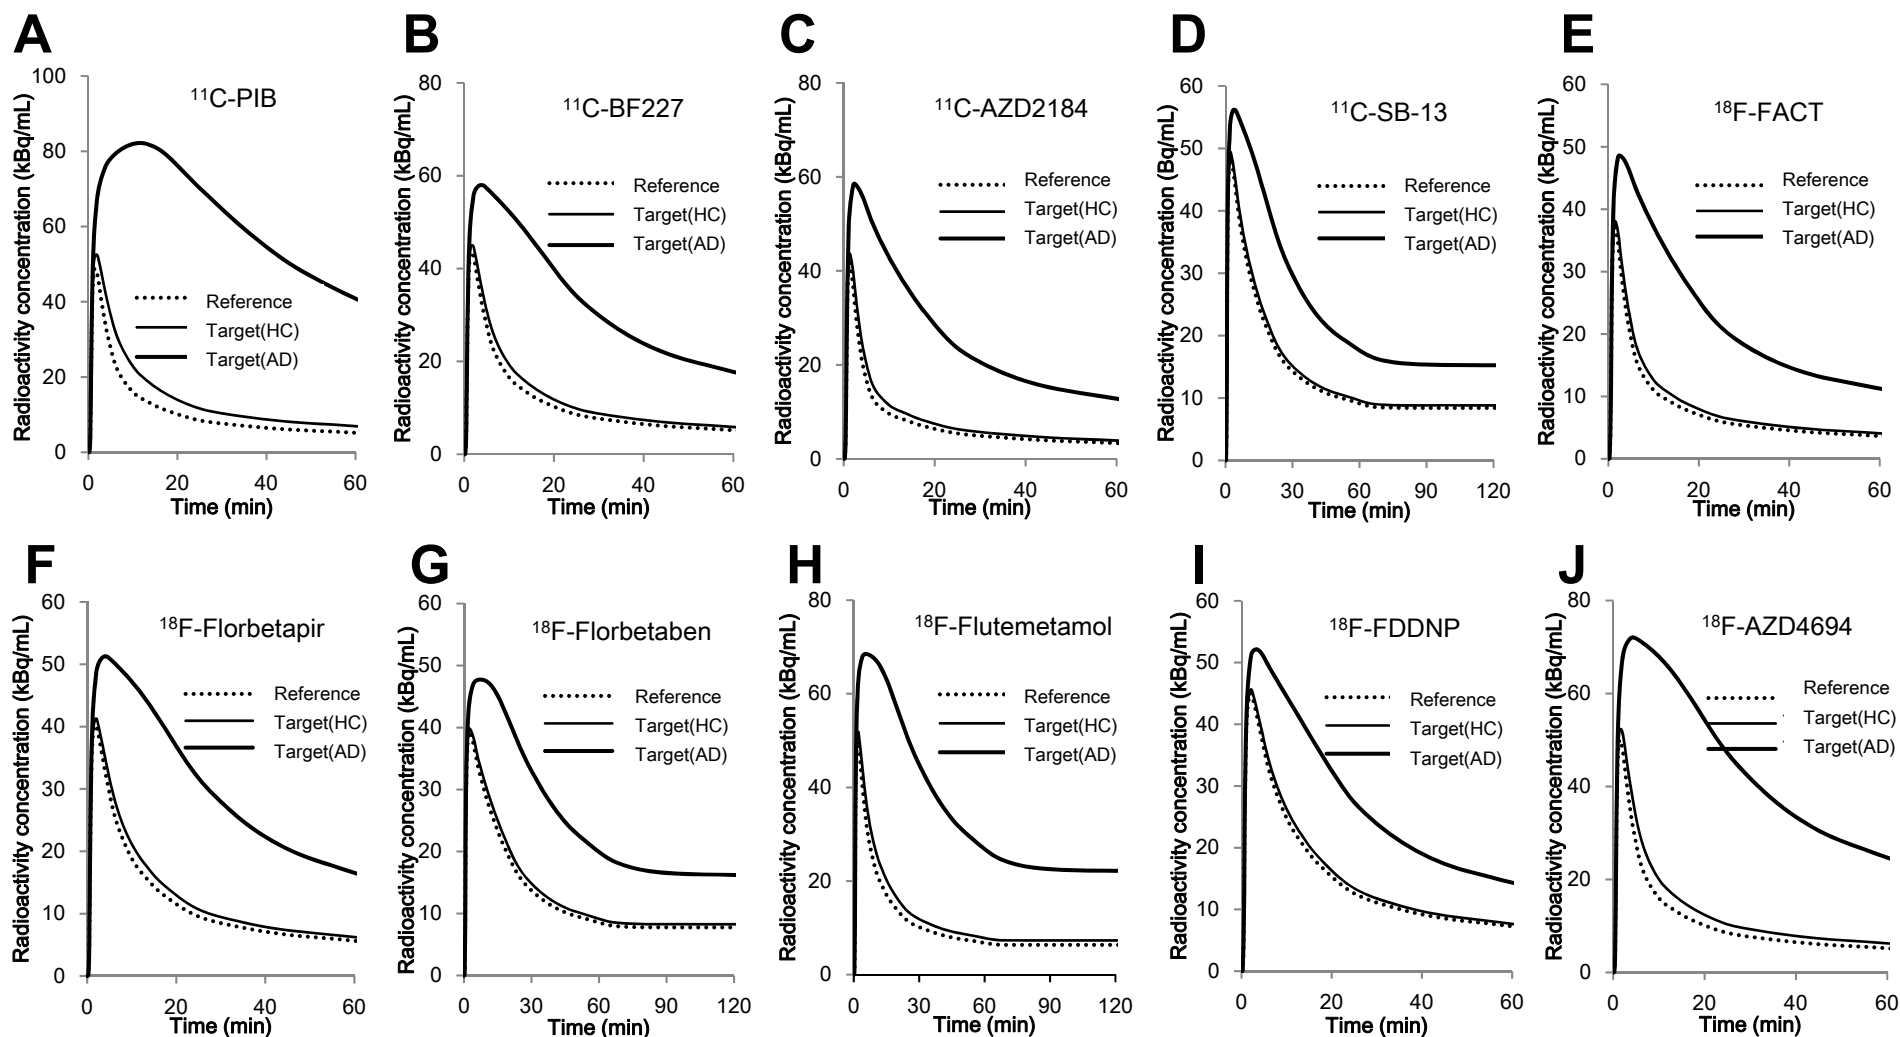

**Supplemental Figure 2.** Predicted time-activity curves for the 10 amyloid radioligands in both target (healthy and AD) and reference regions. (A)  $^{11}\text{C}$ -PIB, (B)  $^{11}\text{C}$ -BF-227, (C)  $^{11}\text{C}$ -AZD2184, (D)  $^{11}\text{C}$ -SB-13, (E)  $^{18}\text{F}$ -FACT, (F)  $^{18}\text{F}$ -florbetapir, (G)  $^{18}\text{F}$ -florbetaben, (H)  $^{18}\text{F}$ -flutemetamol, (I)  $^{18}\text{F}$ -FDDNP, and (J)  $^{18}\text{F}$ -AZD4694. HC = healthy control.
